# Supplementary material for: Sarcopenia in COPD: prevalence, clinical correlates and response to pulmonary rehabilitation
Source: HighWire-hosted journal article supplement (doi:10.1136/thoraxjnl-2014-206440), 2015-01-05
Supplement: thoraxjnl-2014-206440supp.pdf [file thoraxjnl-2014-206440supp.pdf]

# **SARCOPENIA IN COPD: PREVALENCE, CLINICAL CORRELATES AND RESPONSE TO PULMONARY REHABILITATION**

Ms Sarah E. Jones MSc \*

Dr Matthew Maddocks PhD \*

Dr Samantha S. C. Kon MBBS

Dr Jane L. Canavan PhD

Ms Claire M. Nolan MSc

Ms Amy L Clark

Prof Michael I. Polkey PhD

Dr William D-C. Man PhD

\* Contributed equally

## **ONLINE SUPPLEMENT**

## **METHODS**

### *Sarcopenia assessment*

Sarcopenia was defined according to the EWGSOP criteria, as the presence of low skeletal muscle mass, plus low handgrip strength or low physical performance.[1] Whole-body BIA was performed using a Bodystat Quadscan 4000 analyzer (Bodystat Ltd., Isle of Man, UK) applying an 800 $\mu$ A alternating current at 50kHz. Skeletal muscle mass (SMM, kg) was estimated using the formula developed by Janssen *et al*;  $((\text{height}^2/\text{resistance} \times 0.401) + (\text{age} \times -0.071)) + 5.102 + 3.825$  if male.[2] The skeletal muscle mass index (SMI) was also calculated as  $\text{SMM}/\text{m}^2$ . Handgrip strength was measured using the JAMAR Plus digital handheld dynamometer (Sammons Preston; Bolingbrook, IL, USA). Participants performed three maximal isometric contractions and the mean force produced was recorded. Physical performance was assessed by the 4-metre gait speed (4MGS) as previously described.[3] Participants were asked to walk at their usual pace, from a standing start, across a four-meter flat unobstructed course. The time taken to complete the course was recorded using a stopwatch, with the faster of two attempts used to calculate the 4MGS, expressed as meters per second.[3] The following cut-off values were used to identify patients with sarcopenia: SMI of  $\leq 8.50\text{kg}/\text{m}^2$  for men and  $\leq 5.75\text{kg}/\text{m}^2$  for women,[4] and either handgrip strength of  $< 30\text{kg}$  for men and  $< 20\text{kg}$  for women [5] or a gait speed of  $< 0.8\text{m}/\text{s}$  as recommended by the EWGSOP.[1]

### *Additional assessments*

Further measurements included the incremental shuttle walk test (ISWT),[6] five-repetition sit-to-stand test (5STS),[7] short physical performance battery (SPPB)[8]

and quadriceps maximum voluntary contraction (QMVC).[9] Predicted QMVC was calculated using a disease- and sex-specific regression equation [10] and weakness was defined as a QMVC below 1.645 standardised residuals from the healthy predicted value.[10] The St George's Respiratory Disease Questionnaire (SGRQ),[11] COPD Assessment Test (CAT),[12] Medical Research Council (MRC) dyspnoea scale [13] and spirometry were performed. Self-reported physical activity in the previous 7 days was assessed by the modified Minnesota Leisure-time Physical Activity Questionnaire and, in a sub-group, by a multisensory accelerometer (SenseWear, Bodymedia; Pittsburgh, US). Participants wore the accelerometer for 24 hours / day except when performing any tasks that might put the armband at risk of getting wet. When <22.5 hours of use were recorded during the day, data was excluded from analysis [14] Self-reported exacerbations and hospital admissions in the previous 12 months were recorded, and corroborated by primary care records. Co-morbidities were recorded using the age-adjusted Charlson Index.[15] The iBODE composite prognostic index (body mass index, airflow obstruction, dyspnea, and exercise capacity) was also calculated.[16]

### *Pulmonary Rehabilitation*

The PR programme was an eight-week outpatient multi-disciplinary exercise and education programme comprising two supervised and at least one additional home session per week. Supervised sessions comprised of one hour exercise and one hour education. Exercise training was individualised, and in line with UK practice, primarily aerobic in nature. Initial walking speed prescription was at 80% of predicted peak oxygen consumption based on ISWT performance,[9] whilst initial endurance cycling prescription was set at a workload with the aim of patients completing ten

minutes of continuous cycling. Workloads and duration of exercise were continually reassessed and increased through the programme as tolerated. Lower limb resistance training comprised two sets of 10 leg press repetitions performed with an initial training load of 60% one-repetition maximum with one minute rest between sets, as well as sit-to-stand sets, knee lifts/extension and hip abduction with appropriate ankle weights. Upper limb resistance training comprised biceps curls, shoulder press and upright row with appropriate dumbbell weights. Workload was increased as tolerated. Education classes covered a variety of self-management topics including exercise, medication use, diet, coping strategies, increasing physical activity and recognising and managing infections.

**TABLE S1:** Baseline clinical characteristics expressed as mean (SD) and median (25<sup>th</sup>, 75<sup>th</sup> centiles) based presence of quadriceps weakness, sarcopenia or both.

|                                            | <b>Neither quads weakness or sarcopenia (n=206)</b> | <b>Quads weakness (n=268)</b> | <b>Sarcopenia (n=33)</b> | <b>Both (n=47)</b> | <b>p-value</b> |
|--------------------------------------------|-----------------------------------------------------|-------------------------------|--------------------------|--------------------|----------------|
| Age (years)                                | 68 (11)                                             | 70 (9)                        | 73 (7)                   | 72 (9)             | 0.012          |
| Sex (M:F)                                  | 126:80                                              | 148:120                       | 23:10                    | 30:17              | 0.262          |
| MRC                                        | 3 (1)                                               | 3 (1)*                        | 3 (1)                    | 4 (1)*             | 0.001          |
| FEV1 (% predicted)                         | 46.3 (18.3)                                         | 44.8 (18.1)                   | 39.4 (20.5)              | 40.1 (18.3)        | 0.067          |
| BMI (kg/m)                                 | 27.9 (5.0)                                          | 28.2 (5.9)                    | 20.6 (3.1)*              | 21.6 (4.3)*        | <0.001         |
| SMM (kg)                                   | 24.5 (6.8)                                          | 24.2 (6.9)                    | 19.8 (4.8)*              | 18.9 (5.3)*        | <0.001         |
| SMI (kg/m <sup>2</sup> )                   | 8.69 (1.71)                                         | 8.72 (1.85)                   | 7.09 (1.18)*             | 6.84 (1.37)*       | <0.001         |
| Handgrip (kg)                              | 31.2 (10.2)                                         | 26.0 (9.3)*                   | 23.6 (8.8)*              | 20.3 (5.6)*        | <0.001         |
| Peak QMVC (kg)                             | 33.7 (9.8)                                          | 22.1 (7.3)*                   | 25.0 (7.8)*              | 16.1 (4.8)*        | <0.001         |
| QMVC % predicted                           | 77.3 (11.2)                                         | 51.5 (11.0)*                  | 68.7 (13.0)*             | 45.1 (10.1)*       | <0.001         |
| 4MGS (m/s)                                 | 0.98 (0.22)                                         | 0.87 (0.22)*                  | 0.82 (0.19)*             | 0.77 (0.24)*       | <0.001         |
| 5STS (secs)                                | 12.3 (10.1, 14.9)                                   | 15.0 (12.2, 22.7)*            | 15.9 (11.8, 21.4)*       | 24.7 (13.2, 60.0)* | <0.001         |
| SPPB                                       | 11 (10, 12)                                         | 9 (7, 11)*                    | 9 (8, 11)*               | 7 (6, 10)*         | <0.001         |
| ISWT (m)                                   | 278 (162)                                           | 195 (128)*                    | 181 (115)*               | 149 (112)*         | <0.001         |
| CAT                                        | 21 (8)                                              | 21 (8)                        | 23 (9)                   | 25 (9)*            | 0.008          |
| SGRQ Total                                 | 50.2 (17.7)                                         | 52.7 (16.4)                   | 52.4 (17.2)              | 60.6 (17.1)*       | 0.003          |
| Smoking status (current:former:never)      | 42:155:9                                            | 40:212:16                     | 6:24:3                   | 9:35:3             | 0.700          |
| Charlson Index                             | 1 (1, 2)                                            | 1 (1, 2)                      | 1 (1, 2)                 | 1 (1, 3)           | 0.018          |
| Hospital inpatient days previous 12 months | 0 (0, 2)                                            | 0 (0, 4)                      | 0 (0, 1)                 | 0 (0, 5)           | 0.363          |
| Number of exacerbations previous 12 months | 2 (1, 4)                                            | 2 (1, 3)                      | 2 (1, 4)                 | 2 (1, 4)           | 0.991          |
| Self-report physical activity              |                                                     |                               |                          |                    |                |
| Energy expenditure (kcal / week)           | 645 (293, 1428)                                     | 525 (156, 1251)               | 452 (284, 779)           | 210 (8, 656)*      | <0.001         |
| Time in moderate activity (mins / week)    | 185 (80, 406)                                       | 150 (45, 318)                 | 130 (81, 221)            | 60 (4, 183)*       | <0.001         |

Legend: 4MGS = 4-metre gait speed, 5STS = five-repetition sit-to-stand test, BMI = body mass index, CAT = COPD Assessment Test, FEV<sup>1</sup> – Forced expiratory volume in one second, iBODE = body mass index, obstruction, dyspnoea, exercise capacity index, ISWT = incremental shuttle walk test, kcal = kilocalorie, MRC = Medical Research Council, SGRQ = St George’s Respiratory Disease Questionnaire, SMI = skeletal muscle mass index, SMM = skeletal muscle mass, SPPB = short physical performance battery, QMVC = quadriceps maximum voluntary contraction.

\*indicates a statistical significant difference compared to neither quadriceps weakness or sarcopenia.

**FIGURE S1:** Study cohort using the European Working Group on Sarcopenia in Older People (EWGSOP) algorithm for diagnosing sarcopenia.

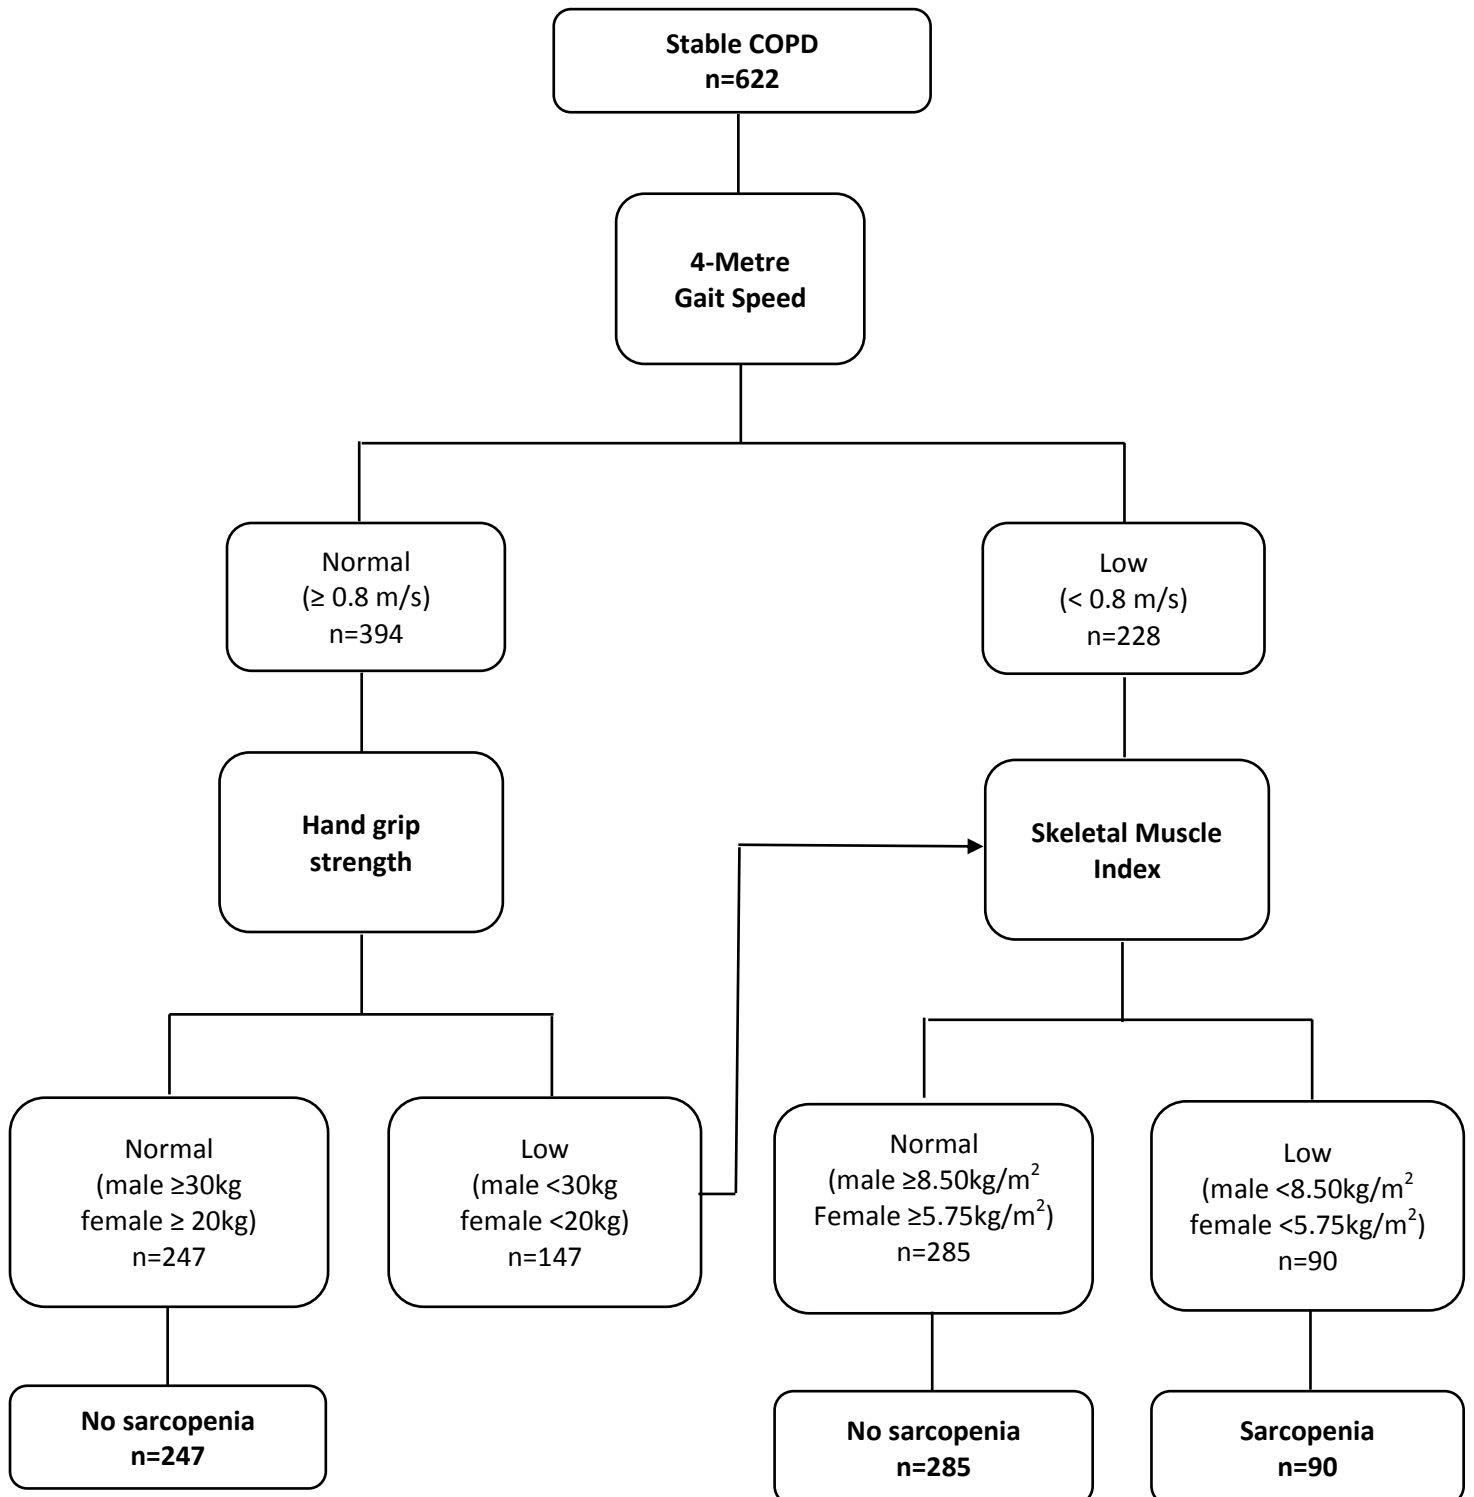

## REFERENCES

1. Cruz-Jentoft AJ, Baeyens JP, Bauer JM, Boirie Y, Cederholm T, Landi F, Martin FC, Michel JP, Rolland Y, Schneider SM, Topinkova E, Vandewoude M, Zamboni M, European Working Group on Sarcopenia in Older P. Sarcopenia: European consensus on definition and diagnosis: Report of the European Working Group on Sarcopenia in Older People. *Age Ageing* 2010;39(4):412-423.
2. Janssen I, Heymsfield SB, Baumgartner RN, Ross R. Estimation of skeletal muscle mass by bioelectrical impedance analysis. *J Appl Physiol* 2000;89(2):465-471.
3. Kon SS, Patel MS, Canavan JL, Clark AL, Jones SE, Nolan CM, Cullinan P, Polkey MI, Man WD. Reliability and validity of 4-metre gait speed in COPD. *Eur Respir J* 2013;42(2):333-340.
4. Janssen I, Baumgartner RN, Ross R, Rosenberg IH, Roubenoff R. Skeletal muscle cutpoints associated with elevated physical disability risk in older men and women. *Am J Epidemiol* 2004;159(4):413-421.
5. Lauretani F, Russo CR, Bandinelli S, Bartali B, Cavazzini C, Di Iorio A, Corsi AM, Rantanen T, Guralnik JM, Ferrucci L. Age-associated changes in skeletal muscles and their effect on mobility: an operational diagnosis of sarcopenia. *J Appl Physiol (1985)* 2003;95(5):1851-1860.
6. Singh SJ, Morgan MD, Scott S, Walters D, Hardman AE. Development of a shuttle walking test of disability in patients with chronic airways obstruction. *Thorax* 1992;47(12):1019-1024.



7. Jones SE, Kon SS, Canavan JL, Patel MS, Clark AL, Nolan CM, Polkey MI, Man WD. The five-repetition sit-to-stand test as a functional outcome measure in COPD. *Thorax* 2013;68(11):1015-1020.
8. Patel MS, Mohan D, Andersson YM, Baz M, Kon SSC, Canavan JL, Jackson SG, Clark AL, Hopkinson NS, Natanek SA, Kemp PR, Bruijnzeel PLB, Man WDC, Polkey MI. Phenotypic characteristics associated with reduced short physical performance battery score in COPD. *Chest* 2014;145(5):1016-1024.
9. Man WD, Hopkinson NS, Harraf F, Nikolettou D, Polkey MI, Moxham J. Abdominal muscle and quadriceps strength in chronic obstructive pulmonary disease. *Thorax* 2005;60(9):718-722.
10. Seymour JM, Spruit MA, Hopkinson NS, Natanek SA, Man WD, Jackson A, Gosker HR, Schols AM, Moxham J, Polkey MI, Wouters EF. The prevalence of quadriceps weakness in COPD and the relationship with disease severity. *Eur Respir J* 2010;36(1):81-88.
11. Jones PW, Quirk FH, Baveystock CM. The St George's Respiratory Questionnaire. *Respir Med* 1991;85 Suppl B:25-31; discussion 33-27.
12. Kon SS, Canavan JL, Jones SE, Nolan CM, Clark AL, Dickson MJ, Haselden BM, Polkey MI, Man WD. Minimum clinically important difference for the COPD Assessment Test: a prospective analysis. *Lancet Respiratory Medicine* 2014;2(3):195-203.
13. Fletcher CM, Elmes PC, Fairbairn AS, Wood CH. The significance of respiratory symptoms and the diagnosis of chronic bronchitis in a working population. *Br Med J* 1959;2(5147):257-266.

14. Garfield BE, Canavan JL, Smith CJ, Ingram KA, Fowler RP, Clark AL, Polkey MI, Man WD. Stanford Seven-Day Physical Activity Recall questionnaire in COPD. *Eur Respir J* 2012;40(2):356-362.
15. Charlson ME, Pompei P, Ales KL, MacKenzie CR. A new method of classifying prognostic comorbidity in longitudinal studies: development and validation. *J Chronic Dis* 1987;40(5):373-383.
16. Williams JE, Green RH, Warrington V, Steiner MC, Morgan MD, Singh SJ. Development of the i-BODE: validation of the incremental shuttle walking test within the BODE index. *Respir Med* 2012;106(3):390-396.
